# Supplementary material for: Molecular Recognition of the Tes LIM2–3 Domains by the Actin-related Protein Arp7A
Source: PubMed Central journal article supplement — J Biol Chem. 2011 Jan 29;286(13):11543–54. doi: 10.1074/jbc.M110.171264 (PMC3064208; doi:10.1074/jbc.m110.171264), 2011-01-29
Supplement: supp_M110.171264_jbc.M110.171264-1.pdf [file supp_M110.171264_jbc.M110.171264-1.pdf]

## SUPPLEMENTARY FIGURE LEGENDS

### **Fig S1. Structural details of the ternary complex and comparison with the LIM3<sup>Tes</sup>-EVH1<sup>Mena</sup> binary complex.**

(A) Electron density (orange) of 28-49<sup>Arp7A</sup> in the ternary complex before inclusion in the crystallographic refinement. (B) Close-up of the contact region centred on the symmetry-related Arp7A His46 with the non-canonical fifth zinc ion associated with the LIM3 domain. (C) Superposition of the EVH1 domains from the ternary 1-65<sup>Arp7A</sup>:LIM2-3<sup>Tes</sup>:EVH1<sup>Mena</sup> (PDB code 2XQN) and binary LIM3<sup>Tes</sup>-EVH1<sup>Mena</sup> (PDB code 2IYB) complexes. Protein chains in the ternary complex are coloured as in Fig. 5(A); the binary complex is in white. (D) In the ternary complex, a symmetry related peptide Arp7A\* (orange) lies in a shallow groove between EVH1 and LIM3 in the ternary structure, pushing them apart.

### **Fig S2. Comparison of tandem LIM domain orientations.**

(A) All three tandem LIM domain crystal structures with bound ligand (gold) superimposed using the C $\alpha$  atoms of the first LIM domain (LIM2 in Tes-Arp7A, LIM1 in 1RUT and 2RGT). The three separate structures are shown for clarity in B, C, and D. (E) Structure-based sequence alignment for the tandem LIM domains. Zinc-binding residues are indicated in pink; pocket-forming residues in green, with those close to A38 of Arp7A in italics; EVH1<sup>Mena</sup> binding residues in orange; other conserved residues in bold black.

### **Table S1.**

Shows the analysis of protein contacts within the 1-65<sup>Arp7A</sup>:LIM2-3<sup>Tes</sup>:EVH1<sup>Mena</sup> ternary complex using the PISA server (39).

A

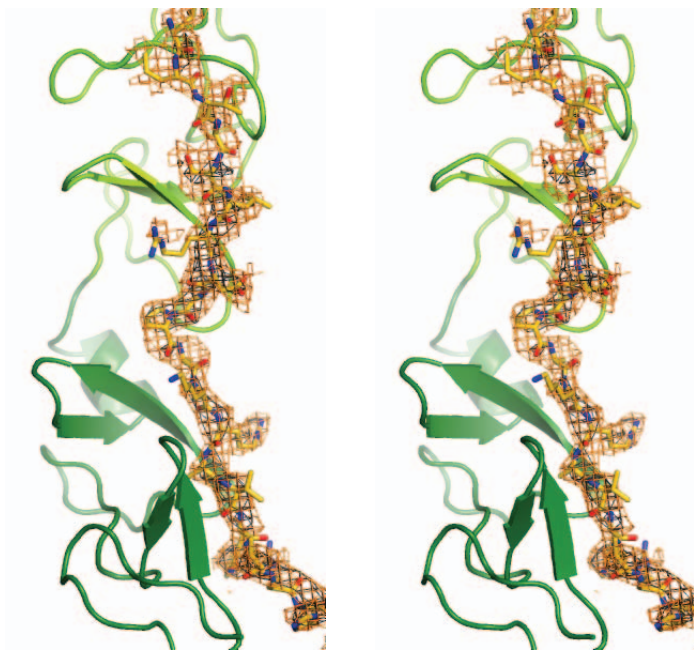

B

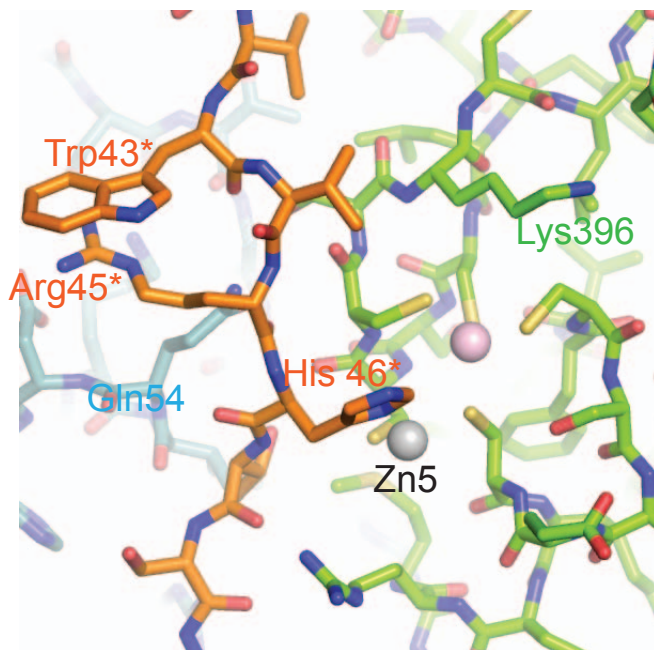

C

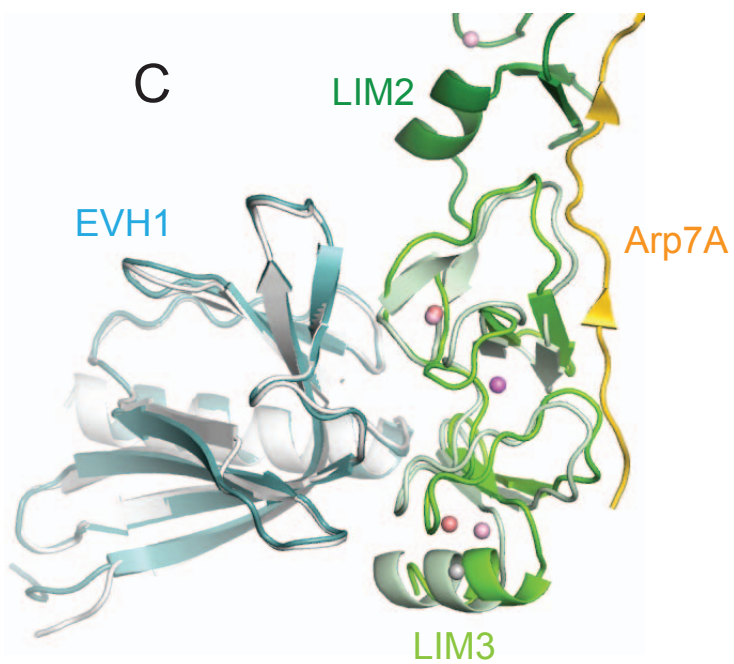

D

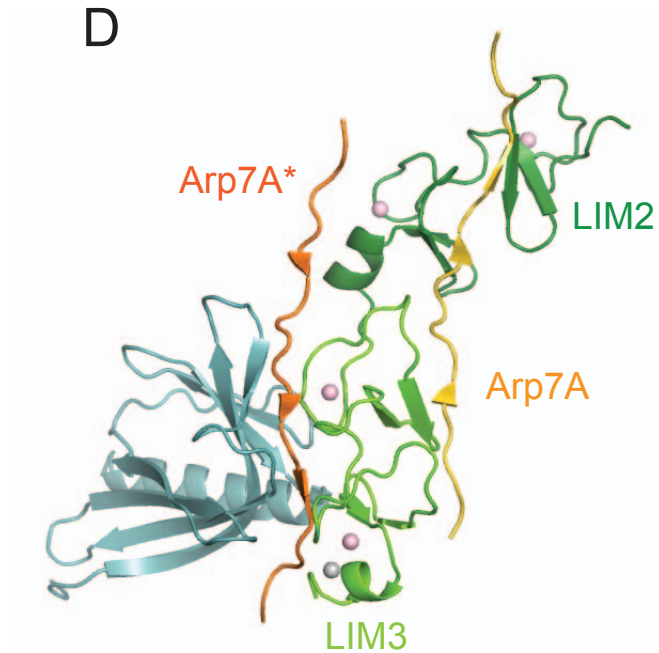

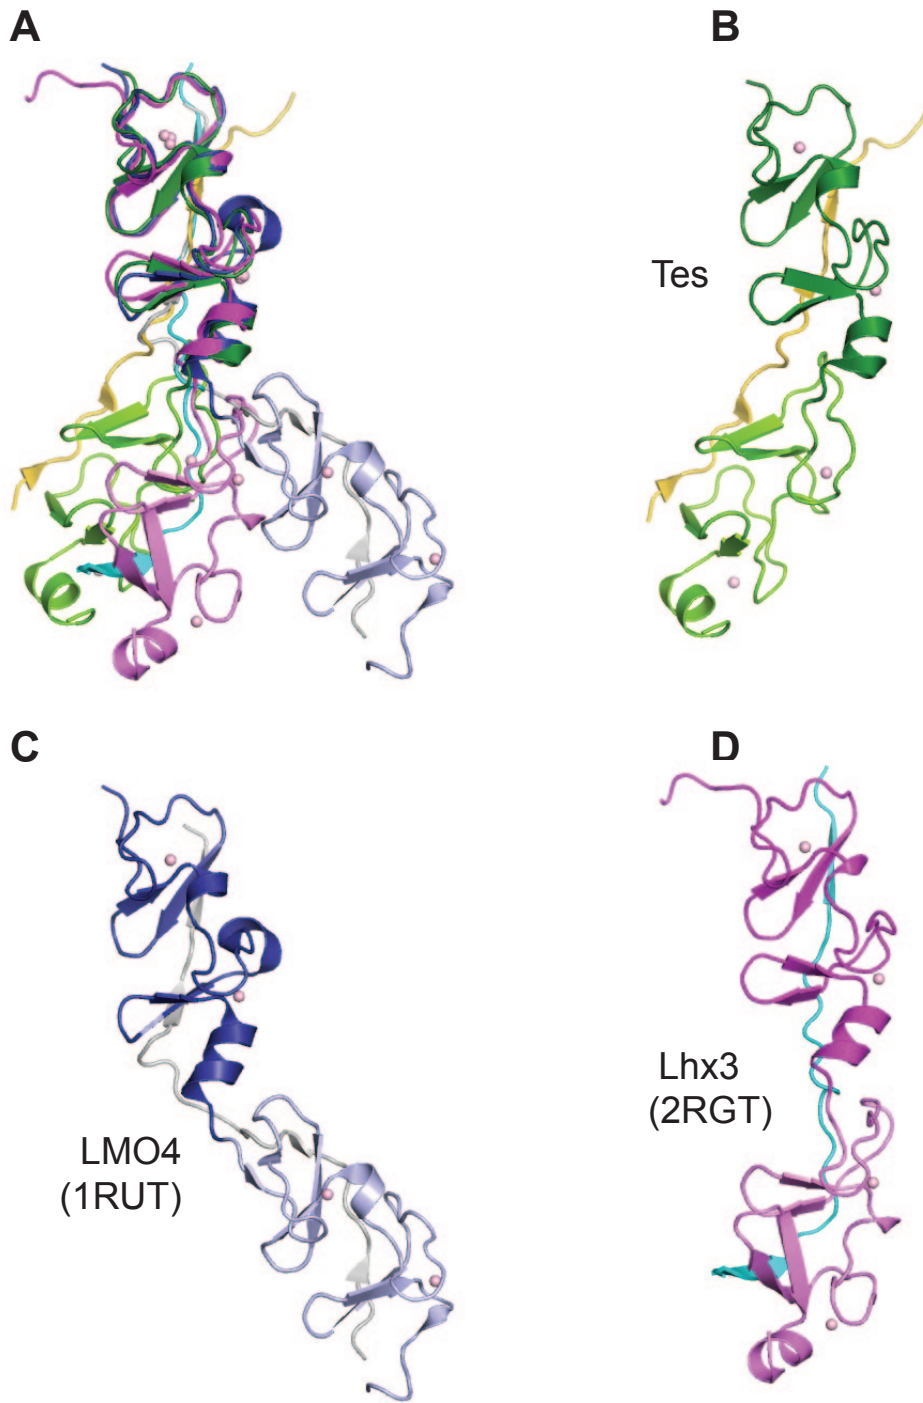

**E**

Tes 297 -EKPR**CAGC**DELIFSNEYTQ**AENQN**WHLK**HFC**CFDCDS**ILAGE**--**IYVM**VNDKPV**CKPC**YVKNHAVV  
 Lhx3 30 PEIPM**CAGC**DQHILDRFILK**ALDRH**WHSK**CLK**CS**DCHVPLAER**---**CFSR**GESVY**CKDD**FFKRFGTK  
 LMO4 19 SWKR**CAGC**GGKIADRFLLY**AMDSY**WHSR**CLK**CS**SCQAQLGD**IGT**SSY**TKSGMIL**CRND**YIRLFGNS

Tes --**CQGCH**NAID**PEVQR**V**TYNN**FSW**HASTE****CF**LC**SC**SK**LIG**-Q**KF**MPV-**EGM**V**FC**SVE**CK**KRMS 421  
 Lhx3 --**CAAC**QLG**IPPT**Q**VVRR**AQDFV**YH**--**LHCF**AC**VV**CKRQ**LAT**GDE**FY**LMEDSRLV**CK**-AD**Y**ETAK 152  
 LMO4 **GAC**S**AC**Q**SIP**ASELV**MR**AQGNV**YH**--**LKCF**TC**ST**CRNRL**VP**GDR**FHYI**-NGSL**FC**E-**HDR**PTAL 145

## Interface Summary

|                                         | Tes                  |                 | Arp7A           |  |
|-----------------------------------------|----------------------|-----------------|-----------------|--|
| Selection range                         | T                    |                 | A               |  |
| Class                                   | Protein              |                 | Protein         |  |
| Symmetry operation                      | x,y,z                |                 | x,y,z           |  |
| Symmetry ID                             | 1_555                |                 | 1_555           |  |
| Number of atoms                         | interface            | 152 (15.6%)     | 117 (69.2%)     |  |
|                                         | surface              | 648 (66.6%)     | 165 (97.6%)     |  |
|                                         | total                | 973 (100.0%)    | 169 (100.0%)    |  |
| Number of residues                      | interface            | 41 (32.8%)      | 19 (86.4%)      |  |
|                                         | surface              | 125 (100.0%)    | 22 (100.0%)     |  |
|                                         | total                | 125 (100.0%)    | 22 (100.0%)     |  |
| Solvent-accessible area, Å <sup>2</sup> | interface            | 1104.2 (13.2%)  | 1327.3 (41.7%)  |  |
|                                         | total                | 8384.9 (100.0%) | 3181.7 (100.0%) |  |
| Solvation energy, kcal/mol              | isolated structure   | -112.7 (100.0%) | -6.9 (100.0%)   |  |
|                                         | gain at complexation | -4.1 (3.6%)     | -10.0 (144.1%)  |  |
|                                         | average gain         | -5.4 (4.8%)     | -8.0 (115.1%)   |  |
|                                         | P-value              | 0.632           | 0.347           |  |

## Hydrogen bonds

| ## | Tes              | Dist. [Å] | Arp7A           |
|----|------------------|-----------|-----------------|
| 1  | T:PHE 403[ N ]   | 2.85      | A:GLN 29[ O ]   |
| 2  | T:ARG 374[ N ]   | 3.01      | A:ARG 34[ O ]   |
| 3  | T:GLN 373[ NE2 ] | 2.81      | A:ASP 35[ OD1 ] |

## Salt bridges

| ## | Tes              | Dist. [Å] | Arp7A          |
|----|------------------|-----------|----------------|
| 1  | T:GLU 317[ OE2 ] | 3.80      | A:LYS 39[ NZ ] |

|    |                 |      |                |
|----|-----------------|------|----------------|
| 4  | T:TYR 340[ N ]  | 3.09 | A:LYS 39[ O ]  |
| 5  | T:GLU 338[ N ]  | 3.77 | A:ALA 41[ O ]  |
| 6  | T:GLY 337[ N ]  | 2.79 | A:ALA 41[ O ]  |
| 7  | T:GLN 315[ N ]  | 2.97 | A:VAL 42[ O ]  |
| 8  | T:TYR 313[ N ]  | 3.12 | A:VAL 44[ O ]  |
| 9  | T:GLN 401[ O ]  | 3.33 | A:ALA 31[ N ]  |
| 10 | T:ARG 374[ O ]  | 2.84 | A:ARG 34[ N ]  |
| 11 | T:THR 376[ OG1] | 3.41 | A:ARG 34[ NE ] |
| 12 | T:PRO 370[ O ]  | 3.02 | A:ALA 38[ N ]  |
| 13 | T:TYR 340[ O ]  | 3.08 | A:LYS 39[ N ]  |
| 14 | T:GLU 317[ OE2] | 3.80 | A:LYS 39[ NZ ] |
| 15 | T:GLY 337[ O ]  | 2.82 | A:ARG 40[ NH1] |
| 16 | T:GLU 338[ O ]  | 3.02 | A:ALA 41[ N ]  |
| 17 | T:GLN 315[ O ]  | 2.89 | A:VAL 42[ N ]  |
| 18 | T:GLU 312[ OE1] | 3.51 | A:TRP 43[ NE1] |
| 19 | T:TYR 313[ O ]  | 2.94 | A:VAL 44[ N ]  |

## Disulfide bonds

| ##                       | Structure 1 | Dist. [Å] | Structure 2 |
|--------------------------|-------------|-----------|-------------|
| No disulfide bonds found |             |           |             |

## Covalent bonds

| ##                      | Structure 1 | Dist. [Å] | Structure 2 |
|-------------------------|-------------|-----------|-------------|
| No covalent bonds found |             |           |             |

## Interfacing residues (not a contact table)

Display level:

■ Inaccessible residues

■ Solvent-accessible residues

**ASA** Accessible Surface Area, Å<sup>2</sup> **BSA** Buried Surface Area, Å<sup>2</sup>

HSDC Residues making Hydrogen/Disulphide bond, Salt bridge or Covalent link

■ Interfacing residues

**Δ'G** Solvation energy effect, kcal/mol |||| Buried area percentage, one bar per 10%

| ## | Tes       | HSDC | ASA    | BSA  | Δ'G   |
|----|-----------|------|--------|------|-------|
| 1  | T:GLU 297 |      | 156.02 | 0.00 | -0.00 |
| 2  | T:LYS 298 |      | 109.31 | 0.00 | 0.00  |
| 3  | T:PRO 299 |      | 42.09  | 0.00 | 0.00  |
| 4  | T:ARG 300 |      | 126.98 | 0.00 | -0.00 |
| 5  | T:CYS 301 |      | 0.49   | 0.00 | 0.00  |
| 6  | T:ALA 302 |      | 46.29  | 0.00 | -0.00 |
| 7  | T:GLY 303 |      | 44.84  | 0.00 | 0.00  |
| 8  | T:CYS 304 |      | 47.26  | 0.00 | -0.00 |
| 9  | T:ASP 305 |      | 87.54  | 0.00 | -0.00 |
| 10 | T:GLU 306 |      | 105.91 | 0.00 | 0.00  |

| ## | Arp7A    | HSDC | ASA    | BSA    | Δ'G   |
|----|----------|------|--------|--------|-------|
| 1  | A:LEU 28 |      | 226.45 | 116.63 | 1.53  |
| 2  | A:GLN 29 | H    | 143.01 | 88.05  | 0.84  |
| 3  | A:THR 30 |      | 138.77 | 50.41  | 0.17  |
| 4  | A:ALA 31 | H    | 93.45  | 88.98  | 0.86  |
| 5  | A:SER 32 |      | 97.12  | 40.86  | 0.23  |
| 6  | A:LEU 33 |      | 185.61 | 103.55 | 1.58  |
| 7  | A:ARG 34 | H    | 214.39 | 76.36  | -0.18 |
| 8  | A:ASP 35 | H    | 125.77 | 31.12  | -0.26 |
| 9  | A:GLY 36 |      | 59.32  | 44.11  | 0.39  |

|    |           |    |        |       |       |
|----|-----------|----|--------|-------|-------|
| 11 | T:LEU 307 |    | 54.99  | 0.00  | 0.00  |
| 12 | T:ILE 308 |    | 1.15   | 0.00  | 0.00  |
| 13 | T:PHE 309 |    | 146.22 | 0.00  | 0.00  |
| 14 | T:SER 310 |    | 64.74  | 0.00  | -0.00 |
| 15 | T:ASN 311 |    | 145.08 | 37.28 | -0.06 |
| 16 | T:GLU 312 | H  | 106.77 | 50.42 | 0.12  |
| 17 | T:TYR 313 | H  | 83.57  | 48.84 | -0.09 |
| 18 | T:THR 314 |    | 9.20   | 9.20  | 0.15  |
| 19 | T:GLN 315 | H  | 138.91 | 61.64 | -0.37 |
| 20 | T:ALA 316 |    | 11.70  | 5.36  | 0.09  |
| 21 | T:GLU 317 | HS | 76.23  | 22.86 | -0.19 |
| 22 | T:ASN 318 |    | 152.76 | 0.00  | 0.00  |
| 23 | T:GLN 319 |    | 75.84  | 0.00  | -0.00 |
| 24 | T:ASN 320 |    | 32.44  | 0.00  | 0.00  |
| 25 | T:TRP 321 |    | 32.58  | 0.00  | 0.00  |
| 26 | T:HIS 322 |    | 45.50  | 0.00  | -0.00 |
| 27 | T:LEU 323 |    | 58.47  | 18.06 | 0.29  |
| 28 | T:LYS 324 |    | 154.64 | 0.00  | 0.00  |
| 29 | T:HIS 325 |    | 82.46  | 0.00  | -0.00 |
| 30 | T:PHE 326 |    | 9.17   | 2.19  | 0.03  |
| 31 | T:CYS 327 |    | 34.33  | 0.00  | -0.00 |
| 32 | T:CYS 328 |    | 1.11   | 0.00  | 0.00  |
| 33 | T:PHE 329 |    | 135.49 | 0.00  | 0.00  |
| 34 | T:ASP 330 |    | 58.55  | 0.00  | -0.00 |
| 35 | T:CYS 331 |    | 64.72  | 0.00  | 0.00  |
| 36 | T:ASP 332 |    | 105.83 | 0.00  | 0.00  |
| 37 | T:SER 333 |    | 53.87  | 0.00  | -0.00 |
| 38 | T:ILE 334 |    | 75.67  | 4.85  | 0.08  |
| 39 | T:LEU 335 |    | 5.78   | 4.10  | 0.02  |
| 40 | T:ALA 336 |    | 31.01  | 26.58 | 0.19  |
| 41 | T:GLY 337 | H  | 86.89  | 69.41 | 0.07  |
| 42 | T:GLU 338 | H  | 112.73 | 15.29 | -0.09 |
| 43 | T:ILE 339 |    | 92.60  | 61.85 | 0.99  |
| 44 | T:TYR 340 | H  | 54.66  | 53.80 | 0.26  |

|    |          |    |        |       |       |
|----|----------|----|--------|-------|-------|
| 10 | A:PRO 37 |    | 132.42 | 76.35 | 1.01  |
| 11 | A:ALA 38 | H  | 94.97  | 72.12 | 1.12  |
| 12 | A:LYS 39 | HS | 189.18 | 81.38 | -0.32 |
| 13 | A:ARG 40 | H  | 209.49 | 74.66 | -0.76 |
| 14 | A:ALA 41 | H  | 98.12  | 98.12 | 1.01  |
| 15 | A:VAL 42 | H  | 120.73 | 45.85 | -0.03 |
| 16 | A:TRP 43 | H  | 180.65 | 94.71 | 0.92  |
| 17 | A:VAL 44 | H  | 129.39 | 84.69 | 0.78  |
| 18 | A:ARG 45 |    | 148.84 | 29.21 | 0.38  |
| 19 | A:HIS 46 |    | 181.09 | 30.18 | 0.75  |
| 20 | A:THR 47 |    | 131.26 | 0.00  | 0.00  |
| 21 | A:SER 48 |    | 115.11 | 0.00  | -0.00 |
| 22 | A:SER 49 |    | 166.60 | 0.00  | 0.00  |

|    |           |   |        |       |       |
|----|-----------|---|--------|-------|-------|
| 45 | T:VAL 341 |   | 33.71  | 32.20 | 0.52  |
| 46 | T:MET 342 |   | 74.26  | 9.13  | -0.01 |
| 47 | T:VAL 343 |   | 24.64  | 0.00  | 0.00  |
| 48 | T:ASN 344 |   | 135.27 | 0.00  | -0.00 |
| 49 | T:ASP 345 |   | 127.57 | 0.00  | -0.00 |
| 50 | T:LYS 346 |   | 45.28  | 0.00  | -0.00 |
| 51 | T:PRO 347 |   | 20.25  | 0.00  | 0.00  |
| 52 | T:VAL 348 |   | 2.18   | 0.00  | 0.00  |
| 53 | T:CYS 349 |   | 12.34  | 0.00  | 0.00  |
| 54 | T:LYS 350 |   | 48.91  | 0.00  | -0.00 |
| 55 | T:PRO 351 |   | 90.01  | 0.00  | -0.00 |
| 56 | T:CYS 352 |   | 18.37  | 0.00  | 0.00  |
| 57 | T:TYR 353 |   | 16.95  | 7.90  | -0.08 |
| 58 | T:VAL 354 |   | 78.66  | 0.00  | -0.00 |
| 59 | T:LYS 355 |   | 100.87 | 0.00  | 0.00  |
| 60 | T:ASN 356 |   | 90.12  | 0.00  | 0.00  |
| 61 | T:HIS 357 |   | 59.15  | 0.00  | 0.00  |
| 62 | T:ALA 358 |   | 56.82  | 0.00  | 0.00  |
| 63 | T:VAL 359 |   | 54.58  | 0.17  | 0.00  |
| 64 | T:VAL 360 |   | 67.94  | 0.00  | 0.00  |
| 65 | T:CYS 361 |   | 0.12   | 0.00  | 0.00  |
| 66 | T:GLN 362 |   | 76.61  | 0.00  | 0.00  |
| 67 | T:GLY 363 |   | 44.92  | 0.00  | 0.00  |
| 68 | T:CYS 364 |   | 48.87  | 0.00  | 0.00  |
| 69 | T:HIS 365 |   | 150.36 | 0.00  | -0.00 |
| 70 | T:ASN 366 |   | 88.08  | 0.00  | -0.00 |
| 71 | T:ALA 367 |   | 52.75  | 0.00  | 0.00  |
| 72 | T:ILE 368 |   | 1.01   | 0.00  | 0.00  |
| 73 | T:ASP 369 |   | 55.78  | 0.00  | -0.00 |
| 74 | T:PRO 370 | H | 32.70  | 32.41 | -0.15 |
| 75 | T:GLU 371 |   | 102.75 | 12.83 | 0.03  |
| 76 | T:VAL 372 |   | 75.12  | 4.17  | -0.02 |
| 77 | T:GLN 373 | H | 157.35 | 80.14 | -0.21 |
| 78 | T:ARG 374 | H | 68.56  | 60.53 | -0.23 |

|     |           |   |        |       |       |
|-----|-----------|---|--------|-------|-------|
| 79  | T:VAL 375 |   | 32.46  | 31.29 | 0.50  |
| 80  | T:THR 376 | H | 83.85  | 52.41 | -0.26 |
| 81  | T:TYR 377 |   | 92.25  | 26.06 | -0.04 |
| 82  | T:ASN 378 |   | 129.18 | 0.00  | -0.00 |
| 83  | T:ASN 379 |   | 152.32 | 0.00  | 0.00  |
| 84  | T:PHE 380 |   | 66.47  | 0.00  | -0.00 |
| 85  | T:SER 381 |   | 13.58  | 0.00  | -0.00 |
| 86  | T:TRP 382 |   | 7.82   | 0.00  | 0.00  |
| 87  | T:HIS 383 |   | 38.87  | 0.00  | 0.00  |
| 88  | T:ALA 384 |   | 52.27  | 8.86  | 0.14  |
| 89  | T:SER 385 |   | 36.19  | 0.00  | -0.00 |
| 90  | T:THR 386 |   | 94.89  | 0.00  | 0.00  |
| 91  | T:GLU 387 |   | 142.31 | 0.00  | -0.00 |
| 92  | T:CYS 388 |   | 11.37  | 0.00  | 0.00  |
| 93  | T:PHE 389 |   | 4.06   | 3.75  | 0.06  |
| 94  | T:LEU 390 |   | 47.47  | 0.00  | -0.00 |
| 95  | T:CYS 391 |   | 3.68   | 0.00  | 0.00  |
| 96  | T:SER 392 |   | 46.93  | 0.00  | 0.00  |
| 97  | T:CYS 393 |   | 42.71  | 0.00  | -0.00 |
| 98  | T:CYS 394 |   | 63.49  | 0.00  | 0.00  |
| 99  | T:SER 395 |   | 74.31  | 0.00  | -0.00 |
| 100 | T:LYS 396 |   | 96.33  | 0.00  | -0.00 |
| 101 | T:CYS 397 |   | 44.18  | 0.00  | -0.00 |
| 102 | T:LEU 398 |   | 0.98   | 0.98  | -0.01 |
| 103 | T:ILE 399 |   | 61.50  | 21.90 | 0.35  |
| 104 | T:GLY 400 |   | 81.34  | 35.82 | 0.12  |
| 105 | T:GLN 401 | H | 87.82  | 13.98 | -0.07 |
| 106 | T:LYS 402 |   | 146.47 | 57.07 | 0.88  |
| 107 | T:PHE 403 | H | 64.87  | 63.45 | 0.32  |
| 108 | T:MET 404 |   | 52.27  | 22.76 | 0.36  |
| 109 | T:PRO 405 |   | 45.01  | 9.71  | 0.16  |
| 110 | T:VAL 406 |   | 69.63  | 0.00  | 0.00  |
| 111 | T:GLU 407 |   | 150.38 | 0.00  | -0.00 |
| 112 | T:GLY 408 |   | 13.88  | 0.00  | -0.00 |



|     |           |  |        |       |       |
|-----|-----------|--|--------|-------|-------|
| 113 | T:MET 409 |  | 95.27  | 0.00  | -0.00 |
| 114 | T:VAL 410 |  | 5.52   | 0.00  | -0.00 |
| 115 | T:PHE 411 |  | 5.47   | 0.00  | -0.00 |
| 116 | T:CYS 412 |  | 26.53  | 5.34  | -0.05 |
| 117 | T:SER 413 |  | 29.60  | 7.17  | 0.11  |
| 118 | T:VAL 414 |  | 85.60  | 12.43 | 0.17  |
| 119 | T:GLU 415 |  | 117.82 | 0.00  | 0.00  |
| 120 | T:CYS 416 |  | 14.38  | 0.00  | -0.00 |
| 121 | T:LYS 417 |  | 74.90  | 0.00  | -0.00 |
| 122 | T:LYS 418 |  | 110.27 | 0.00  | 0.00  |
| 123 | T:ARG 419 |  | 160.89 | 0.00  | 0.00  |
| 124 | T:MET 420 |  | 93.91  | 0.00  | -0.00 |
| 125 | T:SER 421 |  | 138.37 | 0.00  | -0.00 |

---
